# Supplementary material
Source: PubMed Central journal article supplement (PMC6453116)
Supplement: NIHMS1518664-supplement-7.pdf [file NIHMS1518664-supplement-7.pdf]

**Table S1.** The effects of siRNA knockdowns of Pol $\theta$  and other TLS Pols on replicative bypass of a *cis-syn* TT dimer or a (6-4) TT photoproduct carried on the leading or lagging DNA strand template in XPV human fibroblasts (Related to Table 1)

| UV lesion               | siRNA                      | Leading strand                             |                                                       |         | Lagging strand                             |                                                       |         |
|-------------------------|----------------------------|--------------------------------------------|-------------------------------------------------------|---------|--------------------------------------------|-------------------------------------------------------|---------|
|                         |                            | Number of <i>Kan</i> <sup>+</sup> colonies | Number of blue colonies among <i>Kan</i> <sup>+</sup> | TLS (%) | Number of <i>Kan</i> <sup>+</sup> colonies | Number of blue colonies among <i>Kan</i> <sup>+</sup> | TLS (%) |
| <i>cis-syn</i> TT dimer | NC                         | 387                                        | 48                                                    | 12.4    | 495                                        | 52                                                    | 10.5    |
|                         | Pol $\theta$               | 356                                        | 11                                                    | 3.1     | 256                                        | 6                                                     | 2.3     |
| (6-4) TT PP             | NC                         | 482                                        | 90                                                    | 18.6    | 542                                        | 89                                                    | 16.3    |
|                         | Pol $\iota$                | 475                                        | 51                                                    | 10.7    | 485                                        | 46                                                    | 9.5     |
|                         | Pol $\theta$               | 612                                        | 59                                                    | 9.6     | 640                                        | 60                                                    | 9.4     |
|                         | Pol $\theta$ + Pol $\iota$ | 646                                        | 66                                                    | 10.2    | 582                                        | 57                                                    | 9.8     |
|                         | Rev3                       | 584                                        | 51                                                    | 8.7     | 564                                        | 42                                                    | 7.4     |
|                         | Pol $\theta$ + Rev3        | 420                                        | 18                                                    | 4.3     | 395                                        | 15                                                    | 3.8     |

**Table S2.** Effects of siRNA knockdown of Polθ on mutation frequencies and nucleotides inserted opposite a *cis-syn* TT dimer or a (6-4) TT photoproduct carried on the leading or lagging strand DNA template in XPA human fibroblasts (Related to Table 2)

| DNA lesion                 | Lesion containing DNA strand | siRNA | # of <i>Kan</i> <sup>+</sup> blue colonies sequenced | Nucleotide inserted |                       |   |          |       | Mutation frequency % |
|----------------------------|------------------------------|-------|------------------------------------------------------|---------------------|-----------------------|---|----------|-------|----------------------|
|                            |                              |       |                                                      | A                   | G                     | C | T        | Other |                      |
| <i>cis-syn</i><br>TT dimer | Leading                      | NC    | 340 (7) <sup>a</sup>                                 | 333                 | 4 (3' T) <sup>b</sup> | - | 3 (5' T) | -     | 2.1                  |
|                            |                              | Polθ  | 470 (0)                                              | 470                 | -                     | - | -        | -     | 0                    |
|                            | Lagging                      | NC    | 374 (9)                                              | 365                 | 4 (5' T)<br>2 (3' T)  | - | 3 (3' T) | -     | 2.4                  |
|                            |                              | Polθ  | 524 (0)                                              | 524                 | -                     | - | -        | -     | 0                    |
| (6-4) TT<br>PP             | Leading                      | NC    | 432 (6)                                              | 426                 | 2 (5' T)<br>1 (3' T)  | - | 2 (3' T) | 1     | 2.2                  |
|                            |                              | Polθ  | 408(0)                                               | 408                 | -                     | - | -        | -     | 0                    |
|                            | Lagging                      | NC    | 398 (6)                                              | 392                 | 3 (5' T)<br>1 (3' T)  | - | 1 (3' T) | 1     | 1.6                  |
|                            |                              | Polθ  | 412 (0)                                              | 412                 | -                     | - | -        | -     | 0                    |

- a. Numbers of colonies where TLS occurred by insertion of a nucleotide other than an A are shown in parenthesis.
- b. The site where mutation occurred, 3'T or 5'T of the UV lesion is indicated in parenthesis.

**Table S3.** Effects of catalytically active (WT) Pol $\theta$  or catalytically inactive D2540A, E2541A mutant Pol $\theta$  (1708-2590) on TLS opposite a *cis-syn* TT dimer or a (6-4) TT photoproduct carried on the leading strand in normal human fibroblasts (Related to Tables 1 and 2)

| DNA lesion              | siRNA        | Vector expressing                | Number of <i>Kan</i> <sup>+</sup> colonies | Number of blue colonies among <i>Kan</i> <sup>+</sup> colonies | TLS (%) |
|-------------------------|--------------|----------------------------------|--------------------------------------------|----------------------------------------------------------------|---------|
| <i>cis-syn</i> TT dimer | NC           | No Pol $\theta$ (control)        | 408                                        | 88                                                             | 21.6    |
|                         |              | 1708-2590 (WT Pol $\theta$ )     | 384                                        | 80                                                             | 20.8    |
|                         |              | 1708-2590 (mutant Pol $\theta$ ) | 445                                        | 87                                                             | 19.6    |
|                         | Pol $\theta$ | No Pol $\theta$ (control)        | 424                                        | 46                                                             | 10.8    |
|                         |              | 1708-2590 (WT Pol $\theta$ )     | 312                                        | 64                                                             | 20.5    |
|                         |              | 1708-2590 (mutant Pol $\theta$ ) | 584                                        | 56                                                             | 9.6     |
| (6-4) TT PP             | NC           | No Pol $\theta$ (control)        | 394                                        | 74                                                             | 18.8    |
|                         |              | 1708-2590 (WT Pol $\theta$ )     | 402                                        | 80                                                             | 19.9    |
|                         |              | 1708-2590 (mutant Pol $\theta$ ) | 445                                        | 78                                                             | 17.5    |
|                         | Pol $\theta$ | No Pol $\theta$ (control)        | 337                                        | 30                                                             | 8.9     |
|                         |              | 1708-2590 (WT Pol $\theta$ )     | 410                                        | 76                                                             | 18.5    |
|                         |              | 1708-2590 (mutant Pol $\theta$ ) | 486                                        | 41                                                             | 8.4     |

**Table S4.** Viable offspring of Pol $\theta^{+/-}$  Pol $\eta^{+/-}$  x Pol $\theta^{+/-}$  Pol $\eta^{+/-}$  intercrosses (Related to Figure 5)

| Live pups | $\theta^{-/-} \eta^{-/-}$ | $\theta^{-/-} \eta^{+/-}$ | $\theta^{-/-} \eta^{+/+}$ | $\theta^{+/-} \eta^{-/-}$ | $\theta^{+/-} \eta^{+/-}$ | $\theta^{+/-} \eta^{+/+}$ | $\theta^{+/+} \eta^{-/-}$ | $\theta^{+/+} \eta^{+/-}$ | $\theta^{+/+} \eta^{+/+}$ | Total |
|-----------|---------------------------|---------------------------|---------------------------|---------------------------|---------------------------|---------------------------|---------------------------|---------------------------|---------------------------|-------|
| Observed  | 4                         | 14                        | 3                         | 15                        | 42                        | 10                        | 5                         | 9                         | 5                         | 107   |
| Expected  | 6.7                       | 13.4                      | 6.7                       | 13.4                      | 26.7                      | 13.4                      | 6.7                       | 13.4                      | 6.7                       | 107   |

**Table S5.** Primer sequences for RT-PCR in Pol $\theta$  and Pol $\eta$  knockout MEFs (Related to Figures 2 – 4)

| Gene         | Primer Sequences                                                                |
|--------------|---------------------------------------------------------------------------------|
| GAPDH        | Forward: 5'- ATTGTGCACATCCAGGCGG -3'<br>Reverse: 5'- CCTCCTTCATGGACATGGG -3'    |
| Pol $\eta$   | Forward: 5'- GAAGCCCGAGCATTGGTG -3'<br>Reverse: 5'- GCCTCTCCTCAAGTTCCAG -3'     |
| Pol $\theta$ | Forward: 5'- CGGTAGCTGTCACTAGGTTG -3'<br>Reverse: 5'- CAGAGTCTAGTCCTGAAGGTG -3' |
